# Supplementary material
Source: HighWire-hosted journal article supplement (https://bmjopen.bmj.com/content/9/9/e031420)
Supplement: inline-supplementary-material-1 [file inline-supplementary-material-1.pdf]

**Table 1: Association of fatty liver index (FLI) change with risks of developing cardiovascular disease and type 2 diabetes 19 years from baseline**

| FLI change category                                                   | cardiovascular disease          |                                      |                     |                     | Type 2 diabetes                 |                                      |                     |                     |
|-----------------------------------------------------------------------|---------------------------------|--------------------------------------|---------------------|---------------------|---------------------------------|--------------------------------------|---------------------|---------------------|
|                                                                       | Number of subjects (% with CVD) | Incidence rate per 1000 person-years | Model 1 HR (95% CI) | Model 2 HR (95% CI) | Number of subjects (% with T2D) | Incidence rate per 1000 person-years | Model 1 HR (95% CI) | Model 2 HR (95% CI) |
| Baseline low category with no significant increase over 4-years.(1)   | 173(45.1)                       | 23                                   | 1                   | 1                   | 173(9.2)                        | 4                                    | 1                   | 1                   |
| Baseline low category with significant increase over 4 years.(2)      | 80(51.3)                        | 27                                   | 1.27(0.92-1.76)     | 1.20(0.81-1.78)     | 80(22.5)                        | 11                                   | 2.72(1.40-5.31)     | 2.14(1.06-4.29)     |
| Baseline interm. category with significant decrease over 4-years.(3)  | 14(64.3)                        | 31                                   | 1.29(0.66-2.52)     | 1.24(0.62-2.49)     | 14(7.1)                         | 3                                    | 0.75(0.10-5.46)     | 0.54(0.07-4.06)     |
| Baseline interm. category with no significant change over 4-years.(4) | 88(53.4)                        | 29                                   | 1.21(0.84-1.74)     | 1.08(0.73-1.59)     | 88(17.0)                        | 9                                    | 2.13(1.05-4.33)     | 1.39(0.67-2.90)     |
| Baseline interm. category with significant increase over 4 years.(5)  | 55(65.5)                        | 42                                   | 2.04(1.37-3.05)     | 1.75(1.13-2.74)     | 55(21.8)                        | 11                                   | 2.75(1.31-5.76)     | 1.47(0.65-3.34)     |
| Baseline high category with significant decrease over 4-years.(6)     | 10(60.0)                        | 33                                   | 1.39(0.60-3.25)     | 1.36(0.55-3.35)     | 10(40.0)                        | 19                                   | 4.96(1.61-15.30)    | 2.34(0.69-7.90)     |
| Baseline high category with no significant decrease over 4-years.(7)  | 81(54.3)                        | 30                                   | 1.49(1.02-2.20)     | 1.35(0.84-2.14)     | 81(39.5)                        | 23                                   | 6.45(3.46-12.02)    | 3.65(1.72-7.75)     |
| P trend                                                               |                                 |                                      | 0.001               | 0.13                |                                 |                                      | <0.01               | 0.01                |

FLI – fatty liver index. interm. – intermediate. HR – hazard ratio. CI – confidence interval. CVD – cardio-vascular disease. T2D – Type 2 diabetes

Model 1: FLI, age, examination date, baseline smoking pack-years, baseline alcohol consumption per week, baseline physical activity, baseline fruit-berry-vegetable consumption.

Model 2: Model 1 plus fasting glucose, insulin, HDL, LDL, systolic blood pressure, diastolic blood pressure, C-reactive protein, leukocyte count, and thrombocyte count.

**Table 2: Association of fatty liver index (FLI) change with risks of developing cardiovascular disease and type 2 diabetes 19 years from baseline after excluding men with high alcohol intake**

| FLI change category                                                   | cardiovascular disease          |                                      |                     |                     | Type 2 diabetes                 |                                      |                     |                     |
|-----------------------------------------------------------------------|---------------------------------|--------------------------------------|---------------------|---------------------|---------------------------------|--------------------------------------|---------------------|---------------------|
|                                                                       | Number of subjects (% with CVD) | Incidence rate per 1000 person-years | Model 1 HR (95% CI) | Model 2 HR (95% CI) | Number of subjects (% with T2D) | Incidence rate per 1000 person-years | Model 1 HR (95% CI) | Model 2 HR (95% CI) |
| Baseline low category with no significant increase over 4-years.(1)   | 162(46.9)                       | 24                                   | 1                   | 1                   | 162(9.9)                        | 5                                    | 1                   | 1                   |
| Baseline low category with significant increase over 4 years.(2)      | 69(50.7)                        | 27                                   | 1.18(0.79-1.75)     | 1.09(0.71-1.67)     | 69(26.1)                        | 13                                   | 2.64(1.86-3.76)     | 1.98(0.96-4.09)     |
| Baseline interm. category with significant decrease over 4-years.(3)  | 11(63.6)                        | 32                                   | 1.20(0.55-2.59)     | 1.09(0.49-2.44)     | 11(9.1)                         | 4                                    | 0.83(0.30-2.33)     | 0.46(0.06-3.62)     |
| Baseline interm. category with no significant change over 4-years.(4) | 79(49.4)                        | 26                                   | 1.07(0.73-1.57)     | 0.95(0.63-1.44)     | 79(15.2)                        | 8                                    | 1.81(0.85-3.84)     | 1.25(0.57-2.73)     |
| Baseline interm. category with significant increase over 4 years.(5)  | 46(65.2)                        | 42                                   | 1.80(1.17-2.76)     | 1.49(0.92-2.40)     | 46(26.1)                        | 14                                   | 2.58(1.18-5.66)     | 1.41(0.59-3.32)     |
| Baseline high category with significant decrease over 4-years.(6)     | 8(50.0)                         | 27                                   | 0.98(0.49-2.02)     | 0.91(0.31-2.64)     | 8(37.5)                         | 18                                   | 4.23(1.23-14.59)    | 1.94(0.51-7.43)     |
| Baseline high category with no significant decrease over 4-years.(7)  | 58(56.9)                        | 32                                   | 1.52(0.99-2.32)     | 1.33(0.79-2.23)     | 58(44.8)                        | 26                                   | 6.63(3.47-12.67)    | 3.59(1.63-7.90)     |
| P trend                                                               |                                 |                                      | 0.03                | 0.27                |                                 |                                      | <0.01               | 0.01                |

FLI – fatty liver index. interm. – intermediate. HR – hazard ratio. CI – confidence interval. CVD – cardio-vascular disease. T2D – Type 2 diabetes

Model 1: FLI, age, examination date, baseline smoking pack-years, baseline alcohol consumption per week, baseline physical activity, baseline fruit-berry-vegetable consumption.

Model 2: Model 1 plus fasting glucose, insulin, HDL, LDL, systolic blood pressure, diastolic blood pressure, C-reactive protein, leukocyte count, and thrombocyte count.
